# Supplementary material
Source: publisher figshare collection journal article supplement (https://acs.figshare.com/ndownloader/files/26301871)
Supplement: Supplementary file 1 [file 26301871]

Supporting information for

# Seasonal impact of phosphate-based fire retardants on soil chemistry following prophylactic treatment of vegetation

*Anthony C. Yu<sup>a</sup>, Mac Reinhart<sup>b</sup>, Rachel Hunter<sup>b</sup>, Katie Luc<sup>c</sup>, Caitlin L. Maikawa<sup>d</sup>, Nishanta Rajakaruna<sup>e,f</sup>, Jesse D. Acosta<sup>b</sup>, Craig Stubler<sup>b</sup>, Chip Appel<sup>b,\*</sup>, Eric A. Appel<sup>a,d,g\*</sup>*

<sup>a</sup> Department of Materials Science & Engineering, Stanford University, Stanford CA 94305, USA.  
Email: [eappel@stanford.edu](mailto:eappel@stanford.edu)

<sup>b</sup> Department of Natural Resources Management & Environmental Sciences, California Polytechnic State University, San Luis Obispo CA 93407, USA. Email: [cappel@calpoly.edu](mailto:cappel@calpoly.edu)

<sup>c</sup> Department of Earth, Energy and Environmental Sciences, Stanford University, Stanford CA 94305, USA.

<sup>d</sup> Department of Bioengineering, Stanford University, Stanford CA 94305, USA.

<sup>e</sup> Department of Biology, California Polytechnic State University, San Luis Obispo CA 93407, USA.

<sup>f</sup> Unit for Environmental Sciences and Management, North-West University, Potchefstroom, South Africa

<sup>g</sup> Woods Institute for the Environment, Stanford University, Stanford CA 94305, USA.

## Content Summary

Pages: 9

Tables: 7

Figures: 2

**Table S1. Tukey's multiple comparisons test of Figure 1b.**

| Centimeters Rain | MVP vs 95A      | MVP vs FORT.    | 95A vs FORT.    |
|------------------|-----------------|-----------------|-----------------|
| 0                | n.s. (p=0.1786) | n.s. (p=0.2107) | n.s. (p=0.9951) |
| 0.635            | n.s. (p=0.1645) | **** (p<0.0001) | ** (p=0.0034)   |
| 1.27             | n.s. (p=0.8920) | **** (p=0.0002) | **** (p<0.0001) |
| 2.54             | n.s. (p=0.9841) | **** (p<0.0001) | **** (p<0.0001) |
| 3.81             | n.s. (p=0.6802) | **** (p<0.0001) | **** (p<0.0001) |
| 5.08             | n.s. (p=0.6878) | **** (p<0.0001) | ** (p=0.0011)   |

**Table S2. Tukey's multiple comparisons test of Figure 2c.**

| <b>0.75 cm</b>     |           | <b>P value</b>    |
|--------------------|-----------|-------------------|
| <b>C vs. MVP</b>   | <b>**</b> | <b>0.0089</b>     |
| <b>C vs. 95A</b>   | <b>ns</b> | <b>0.9994</b>     |
| <b>C vs. 1</b>     | <b>ns</b> | <b>0.9613</b>     |
| <b>MVP vs. 95A</b> | <b>*</b>  | <b>0.0126</b>     |
| <b>MVP vs. 1</b>   | <b>*</b>  | <b>0.0351</b>     |
| <b>95A vs. 1</b>   | <b>ns</b> | <b>0.9822</b>     |
| <b>2.5 cm</b>      |           |                   |
| <b>C vs. MVP</b>   | <b>ns</b> | <b>0.8736</b>     |
| <b>C vs. 95A</b>   | <b>ns</b> | <b>&gt;0.9999</b> |
| <b>C vs. 1</b>     | <b>ns</b> | <b>0.9999</b>     |
| <b>MVP vs. 95A</b> | <b>ns</b> | <b>0.8560</b>     |
| <b>MVP vs. 1</b>   | <b>ns</b> | <b>0.9026</b>     |
| <b>95A vs. 1</b>   | <b>ns</b> | <b>0.9995</b>     |
| <b>11 cm</b>       |           |                   |
| <b>C vs. MVP</b>   | <b>ns</b> | <b>&gt;0.9999</b> |
| <b>C vs. 95A</b>   | <b>ns</b> | <b>0.7534</b>     |
| <b>C vs. 1</b>     | <b>ns</b> | <b>0.9996</b>     |
| <b>MVP vs. 95A</b> | <b>ns</b> | <b>0.7409</b>     |
| <b>MVP vs. 1</b>   | <b>ns</b> | <b>0.9993</b>     |
| <b>95A vs. 1</b>   | <b>ns</b> | <b>0.8086</b>     |
| <b>71 cm</b>       |           |                   |
| <b>C vs. MVP</b>   | <b>ns</b> | <b>0.8793</b>     |
| <b>C vs. 95A</b>   | <b>ns</b> | <b>&gt;0.9999</b> |
| <b>C vs. 1</b>     | <b>ns</b> | <b>0.9312</b>     |
| <b>MVP vs. 95A</b> | <b>ns</b> | <b>0.8831</b>     |
| <b>MVP vs. 1</b>   | <b>ns</b> | <b>0.9990</b>     |
| <b>95A vs. 1</b>   | <b>ns</b> | <b>0.9339</b>     |

**Table S3. Tukey's multiple comparisons test of Figure 2d.**

| <b>0.75 cm</b>     |    | <b>P value</b> |
|--------------------|----|----------------|
| <b>C vs. MVP</b>   | ns | 0.0545         |
| <b>C vs. 95A</b>   | ns | 0.9853         |
| <b>C vs. 1</b>     | ns | 0.9747         |
| <b>MVP vs. 95A</b> | ns | 0.1215         |
| <b>MVP vs. 1</b>   | ns | 0.1412         |
| <b>95A vs. 1</b>   | ns | 0.9999         |
| <b>2.5 cm</b>      |    |                |
| <b>C vs. MVP</b>   | ns | 0.3385         |
| <b>C vs. 95A</b>   | ns | 0.9273         |
| <b>C vs. 1</b>     | ns | 0.9821         |
| <b>MVP vs. 95A</b> | ns | 0.1069         |
| <b>MVP vs. 1</b>   | ns | 0.5585         |
| <b>95A vs. 1</b>   | ns | 0.7569         |
| <b>11 cm</b>       |    |                |
| <b>C vs. MVP</b>   | ns | 0.9800         |
| <b>C vs. 95A</b>   | ns | 0.3687         |
| <b>C vs. 1</b>     | ns | 0.9016         |
| <b>MVP vs. 95A</b> | ns | 0.1905         |
| <b>MVP vs. 1</b>   | ns | 0.7053         |
| <b>95A vs. 1</b>   | ns | 0.7829         |
| <b>71 cm</b>       |    |                |
| <b>C vs. MVP</b>   | ns | 0.9263         |
| <b>C vs. 95A</b>   | ns | 0.9905         |
| <b>C vs. 1</b>     | ns | 0.9994         |
| <b>MVP vs. 95A</b> | ns | 0.9889         |
| <b>MVP vs. 1</b>   | ns | 0.9597         |
| <b>95A vs. 1</b>   | ns | 0.9979         |

**Table S4. Tukey's multiple comparisons test of Figure 2e.**

| <b>0.75 cm</b>     |      | <b>P value</b> |
|--------------------|------|----------------|
| <b>C vs. MVP</b>   | ***  | 0.0002         |
| <b>C vs. 95A</b>   | ***  | 0.0007         |
| <b>C vs. 1</b>     | **   | 0.0094         |
| <b>MVP vs. 95A</b> | ns   | 0.9844         |
| <b>MVP vs. 1</b>   | ns   | 0.6516         |
| <b>95A vs. 1</b>   | ns   | 0.8509         |
| <b>2.5 cm</b>      |      |                |
| <b>C vs. MVP</b>   | ns   | 0.0598         |
| <b>C vs. 95A</b>   | ***  | 0.0004         |
| <b>C vs. 1</b>     | **** | <0.0001        |
| <b>MVP vs. 95A</b> | ns   | 0.3485         |
| <b>MVP vs. 1</b>   | ***  | 0.0001         |
| <b>95A vs. 1</b>   | *    | 0.0239         |
| <b>11 cm</b>       |      |                |
| <b>C vs. MVP</b>   | ns   | 0.5226         |
| <b>C vs. 95A</b>   | **   | 0.0055         |
| <b>C vs. 1</b>     | ***  | 0.0005         |
| <b>MVP vs. 95A</b> | ns   | 0.1814         |
| <b>MVP vs. 1</b>   | *    | 0.0323         |
| <b>95A vs. 1</b>   | ns   | 0.8755         |
| <b>71 cm</b>       |      |                |
| <b>C vs. MVP</b>   | ns   | 0.7394         |
| <b>C vs. 95A</b>   | ns   | 0.7752         |
| <b>C vs. 1</b>     | ns   | 0.1816         |
| <b>MVP vs. 95A</b> | ns   | >0.9999        |
| <b>MVP vs. 1</b>   | ns   | 0.7362         |
| <b>95A vs. 1</b>   | ns   | 0.6988         |

**Table S5. Tukey's multiple comparisons test of Figure 3a.**

| <b>0.75 cm</b>      |    | <b>P value</b> |
|---------------------|----|----------------|
| Control vs. MVP     | *  | 0.0492         |
| Control vs. 95A     | ** | 0.0036         |
| Control vs. Fortify | ns | 0.4738         |
| MVP vs. 95A         | ns | 0.7207         |
| MVP vs. Fortify     | ns | 0.5952         |
| 95A vs. Fortify     | ns | 0.1169         |
| <b>2.5 cm</b>       |    |                |
| Control vs. MVP     | ns | 0.8654         |
| Control vs. 95A     | ns | 0.2668         |
| Control vs. Fortify | ** | 0.0078         |
| MVP vs. 95A         | ns | 0.7029         |
| MVP vs. Fortify     | ns | 0.0514         |
| 95A vs. Fortify     | ns | 0.3848         |
| <b>11 cm</b>        |    |                |
| Control vs. MVP     | ns | 0.9058         |
| Control vs. 95A     | ns | 0.7962         |
| Control vs. Fortify | ns | 0.6927         |
| MVP vs. 95A         | ns | 0.9949         |
| MVP vs. Fortify     | ns | 0.9739         |
| 95A vs. Fortify     | ns | 0.9978         |
| <b>71 cm</b>        |    |                |
| Control vs. MVP     | ns | >0.9999        |
| Control vs. 95A     | ns | >0.9999        |
| Control vs. Fortify | ns | 0.9916         |
| MVP vs. 95A         | ns | >0.9999        |
| MVP vs. Fortify     | ns | 0.9951         |
| 95A vs. Fortify     | ns | 0.9927         |

**Table S6. Tukey's multiple comparisons test of Figure 3b.**

| <b>0.75 cm</b>      |      | <b>P value</b> |
|---------------------|------|----------------|
| Control vs. MVP     | ns   | 0.0873         |
| Control vs. 95A     | ***  | 0.0003         |
| Control vs. Fortify | ns   | 0.6732         |
| MVP vs. 95A         | ns   | 0.1586         |
| MVP vs. Fortify     | ns   | 0.5563         |
| 95A vs. Fortify     | **   | 0.0077         |
| <b>2.5 cm</b>       |      |                |
| Control vs. MVP     | ns   | 0.9742         |
| Control vs. 95A     | ns   | 0.1039         |
| Control vs. Fortify | ns   | 0.9640         |
| MVP vs. 95A         | ns   | 0.2297         |
| MVP vs. Fortify     | ns   | >0.9999        |
| 95A vs. Fortify     | ns   | 0.2510         |
| <b>11 cm</b>        |      |                |
| Control vs. MVP     | **** | <0.0001        |
| Control vs. 95A     | **** | <0.0001        |
| Control vs. Fortify | **** | <0.0001        |
| MVP vs. 95A         | ns   | 0.1748         |
| MVP vs. Fortify     | **   | 0.0010         |
| 95A vs. Fortify     | ns   | 0.1670         |
| <b>71 cm</b>        |      |                |
| Control vs. MVP     | ns   | 0.9937         |
| Control vs. 95A     | ns   | 0.8541         |
| Control vs. Fortify | ns   | 0.7166         |
| MVP vs. 95A         | ns   | 0.9489         |
| MVP vs. Fortify     | ns   | 0.8548         |
| 95A vs. Fortify     | ns   | 0.9938         |

**Table S7. Tukey's multiple comparisons test of Figure 3c.**

| <b>0.75 cm</b>      |     | <b>P value</b> |
|---------------------|-----|----------------|
| Control vs. MVP     | **  | 0.0012         |
| Control vs. 95A     | **  | 0.0041         |
| Control vs. Fortify | ns  | 0.1393         |
| MVP vs. 95A         | ns  | 0.9663         |
| MVP vs. Fortify     | ns  | 0.2256         |
| 95A vs. Fortify     | ns  | 0.4537         |
| <b>2.5 cm</b>       |     |                |
| Control vs. MVP     | ns  | 0.4770         |
| Control vs. 95A     | ns  | 0.0510         |
| Control vs. Fortify | *** | 0.0005         |
| MVP vs. 95A         | ns  | 0.6019         |
| MVP vs. Fortify     | *   | 0.0255         |
| 95A vs. Fortify     | ns  | 0.3151         |
| <b>11 cm</b>        |     |                |
| Control vs. MVP     | ns  | 0.1387         |
| Control vs. 95A     | **  | 0.0026         |
| Control vs. Fortify | *** | 0.0001         |
| MVP vs. 95A         | ns  | 0.3616         |
| MVP vs. Fortify     | ns  | 0.0515         |
| 95A vs. Fortify     | ns  | 0.7288         |
| <b>71 cm</b>        |     |                |
| Control vs. MVP     | ns  | 0.6385         |
| Control vs. 95A     | ns  | 0.4485         |
| Control vs. Fortify | *   | 0.0185         |
| MVP vs. 95A         | ns  | 0.9892         |
| MVP vs. Fortify     | ns  | 0.2310         |
| 95A vs. Fortify     | ns  | 0.3770         |



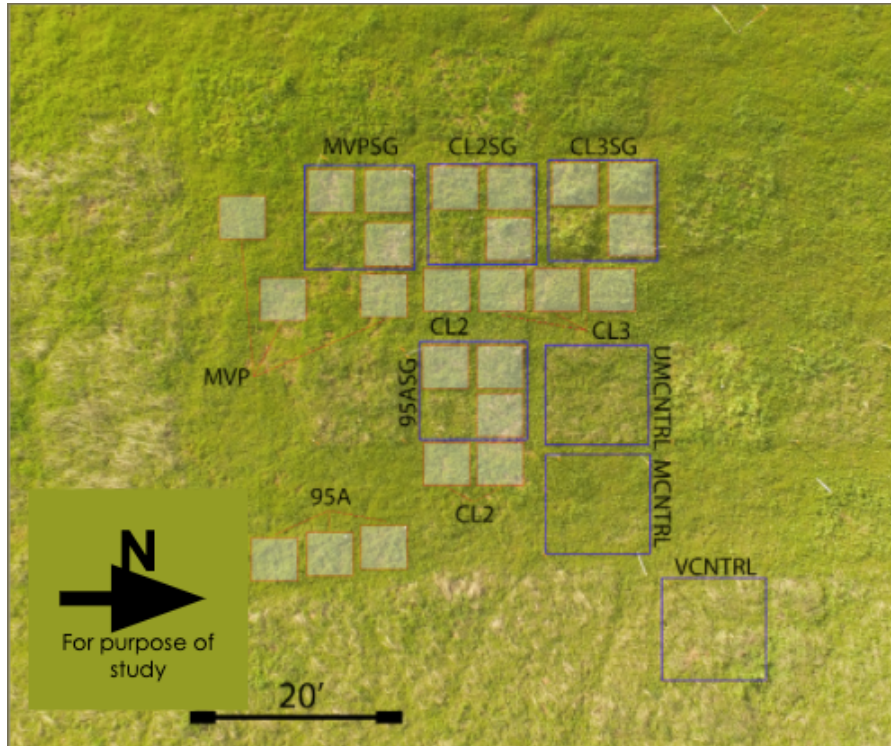

**Figure S1. Diagram of research site.** Blue squares are roughly 4 m<sup>2</sup> plots and red squares are 1 m<sup>2</sup> treatment replicate quadrants.

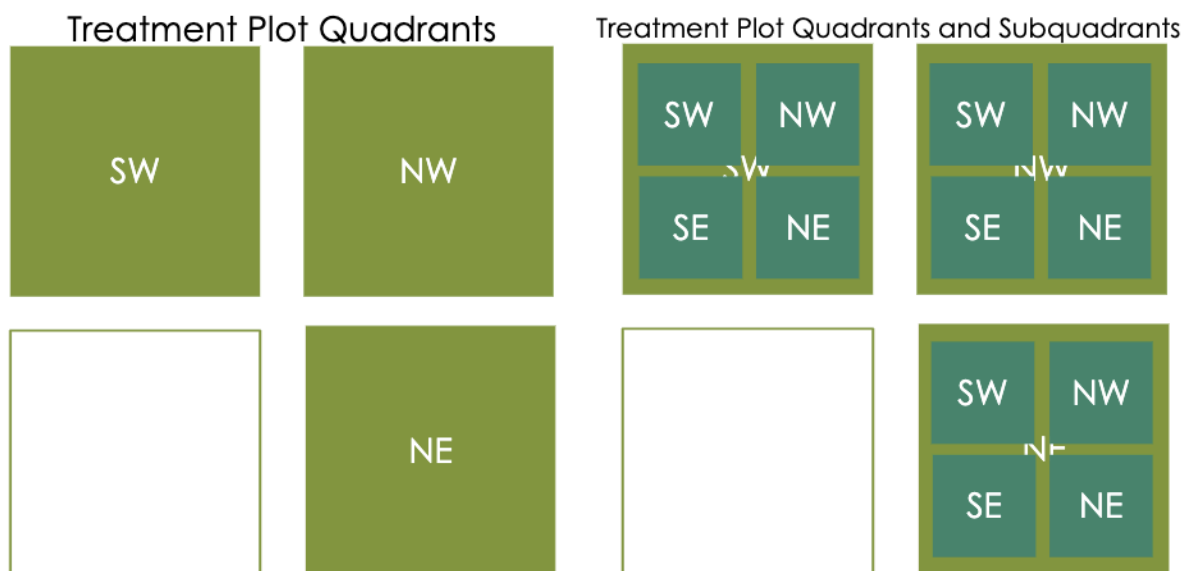

**Figure S2. Diagram of treatment plot quadrants and sub-quadrants.** 3 of 4 quadrants were sampled from during each collection to achieve triplicate samples of each treatment, excluding the SE quadrant in each plot. Samples were obtained from undisturbed sub-quadrants during each collection by avoiding previously sampled sub-quadrants.
